# Supplementary material for: NIR light-triggered photodynamic antibacterial nanofiber membrane based on polycaprolactone and phthalocyanine derivative for biomedical applications
Source: Royal Society of Chemistry journal article supplement (doi:10.1039/d4ra03803g), 2024-01-01
Supplement: d4ra03803g1.pdf [file d4ra03803g1.pdf]

## Supporting Information

### **NIR light triggered photodynamic antibacterial nanofiber membrane based on polycaprolactone and phthalocyanine derivative for biomedical applications**

**Asmaa M. Abd El-Aziz,<sup>a</sup> Eman Serag,<sup>b</sup> Mohamed E. El-Khouly<sup>\*,c</sup>**

<sup>a</sup> *Fabrication Technology Research Department, Advanced Technology and New Materials Research Institute (ATNMRI), City of Scientific Research and Technological Applications (SRTA-City), Alexandria, Egypt.*

<sup>b</sup> *Marine Pollution Department, Environmental Division, National Institute of Oceanography and Fisheries, Kayet Bey, Elanfoushy, Alexandria, Egypt.*

<sup>c</sup> *Nanoscience Program, Institute of Basic and Applied Science, Egypt-Japan University of Science and Technology (E-JUST), Alexandria, Egypt*

**E-mail:** [Mohamed.elkhouly@ejust.edu.eg](mailto:Mohamed.elkhouly@ejust.edu.eg)

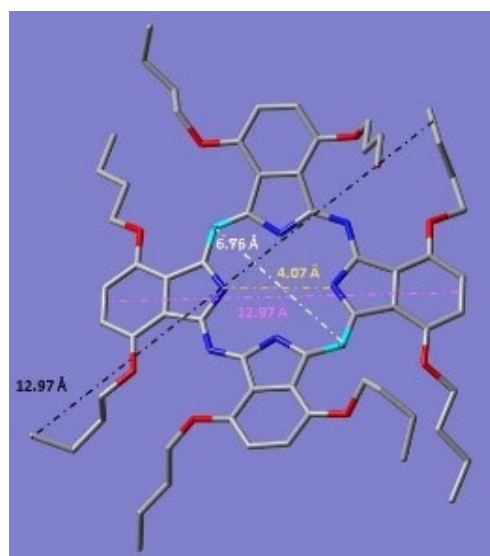

**Fig. S1** Optimized structures of OBUcPc.

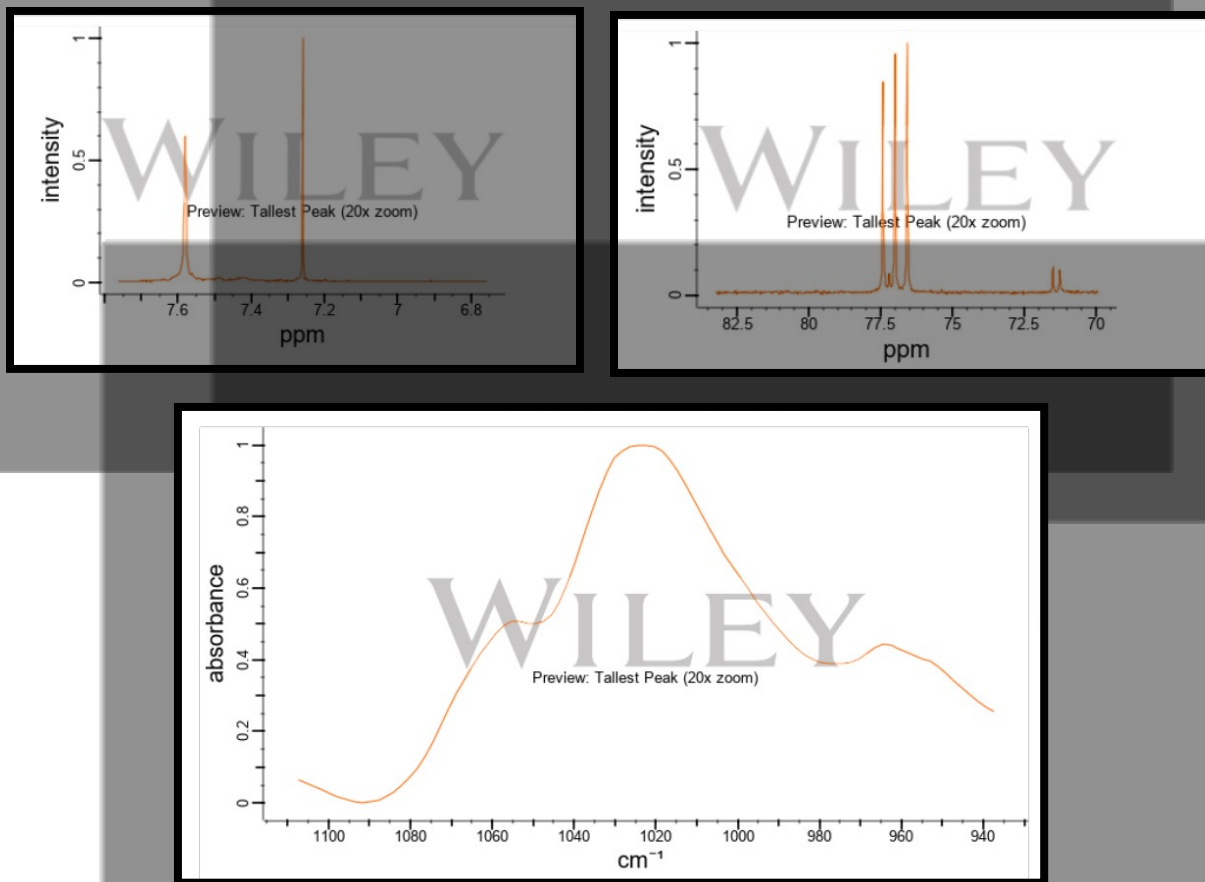

**Fig. S2** (a)  $^1\text{H}$  NMR Spectra, (b)  $^{13}\text{C}$  NMR Spectra, and (c) ATR-IR Spectra of OBUcPc.

Copyright © 2021-2024 Sigma-Aldrich Co. LLC. - Database Compilation Copyright © 2021 John Wiley & Sons, Inc. All Rights Reserved.

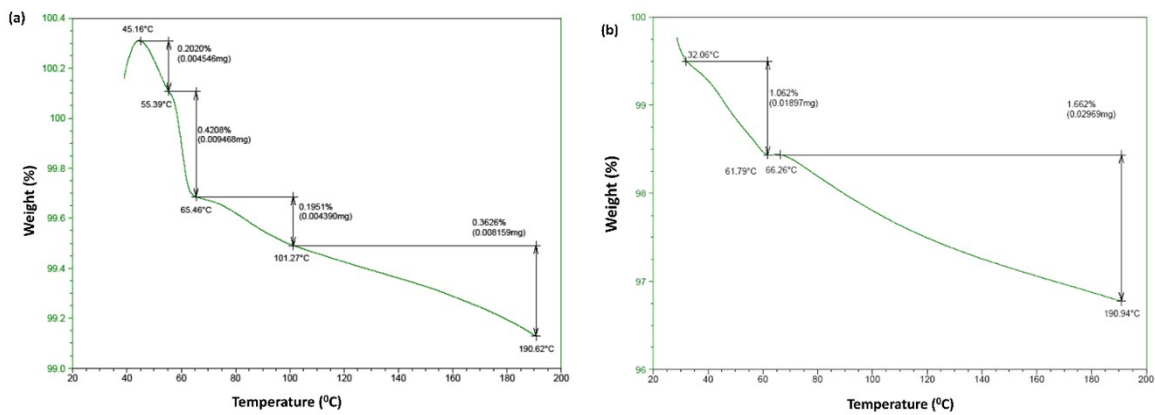

**Fig. S3** TGA analysis of the PCL nanofibrous membranes (a): PCL, and (b): Modified PCL nanofibrous membrane with 4.6 % OBUPC.

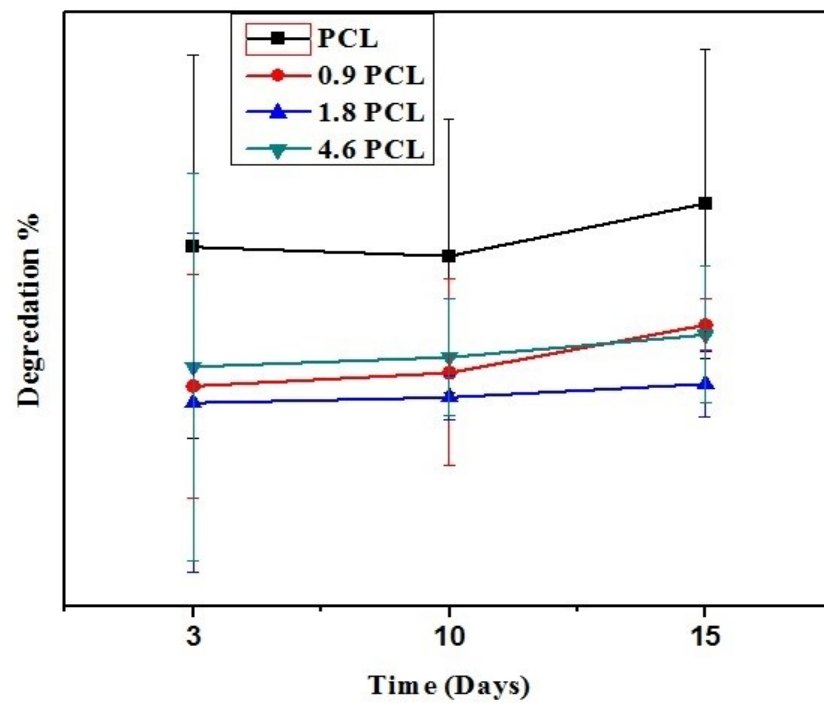

Fig. S4 Degradation % of PCL nanofibrous membranes.
